# Supplementary material
Source: Springer Nature journal article supplement (https://www.springermedizin.de/resource/supplementary/12885_2007_869_MOESM17_ESM.pdf/9470540)
Supplement: MOESM17 [file 9470540]

OMRF 7T/30

A

BRUKER spect

RS\_7

Date: 1 Aug 2005

RS\_7

Time: 22:46

\*

M 5.0 kg

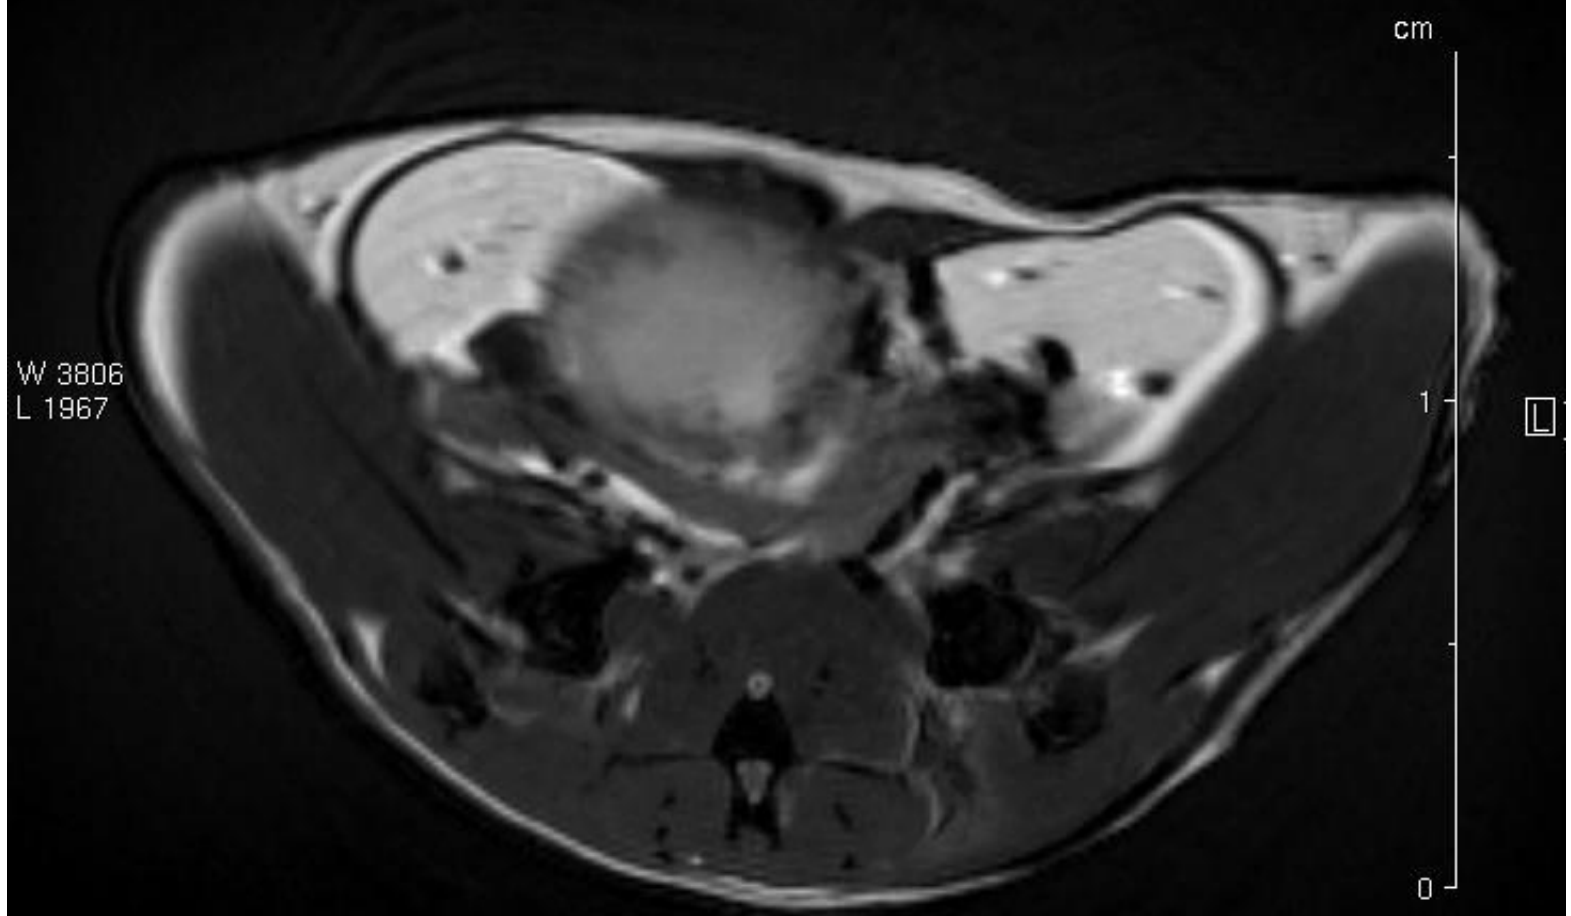

W 3806  
L 1967

Scan: 14  
Slice: 1/8  
Echo: 1/2  
MSME (pvm)  
TR: 1200.0 ms  
TE: 17.4 ms  
NEX 4

SI 1.00/1.15 mm  
FOV 3.2 cm  
MTX 256  
Pos 0.38 mm H  
bladder MRI: 1  
OMRF\_double\_echo, 14:1
